# Supplementary material
Source: HighWire-hosted journal article supplement (https://gut.bmj.com/content/66/1/6)
Supplement: inline-supplementary-material-1 [file inline-supplementary-material-1.pdf]

## Appendix

Grades of recommendation and evidence levels in support of the recommendations formulated in the Maastricht IV / Florence Consensus Report

| Grade of recommendations* | Evidence level | Type of studies                                                                                                 |
|---------------------------|----------------|-----------------------------------------------------------------------------------------------------------------|
| A                         | 1              | Systematic review of randomized controlled trial (RCT of good methodology quality and with homogeneity)         |
|                           | 1a             | Individual RCT with narrow CI                                                                                   |
|                           | 1b<br>1c       | Individual RCT with risk of bias                                                                                |
| B                         | 2              | Systematic review of cohort studies (with homogeneity)                                                          |
|                           | 2a             | Individual cohort study (including low quality RCT, eg < 80% follow-up)                                         |
|                           | 2b             | Non-controlled cohort studies/ecological studies                                                                |
|                           | 2c             | Systematic review of case-control studies (with homogeneity)                                                    |
|                           | 3a<br>3b       | Individual case-control study                                                                                   |
| C                         |                | Case series/poor quality cohort or case-control studies                                                         |
| D                         |                | Expert opinion without explicit critical appraisal or based on physiology, bench research or “first principles” |

\*The highest grade of recommendation does not always correspond to the highest evidence level.
