# Supplementary material
Source: HighWire-hosted journal article supplement (https://gut.bmj.com/content/66/1/6)
Supplement: inline-supplementary-material-2 [file inline-supplementary-material-2.pdf]

**Table 1.: Recent studies on positive associations of *Helicobacter pylori* infection with extra-gastric disease**

<sup>1</sup>Population-based retrospective cohort study; <sup>2</sup>Prospective cohort study; <sup>3</sup>Meta-analysis; <sup>4</sup>Population-based prospective cohort study; <sup>5</sup>Systematic review; <sup>6</sup>Randomised controlled trial

| Disease                           | Number of Patients                                                                                    | References                      |
|-----------------------------------|-------------------------------------------------------------------------------------------------------|---------------------------------|
| <i>Cardiovascular diseases</i>    |                                                                                                       |                                 |
| Acute coronary syndrome           | 85375 <sup>1</sup><br>433 <sup>2</sup><br>21829 <sup>3</sup><br>300 <sup>2</sup><br>9953 <sup>4</sup> | 445<br>446<br>447<br>448<br>449 |
| Ischemic stroke                   | 86660 <sup>1</sup>                                                                                    | 450                             |
| <i>Metabolic disorders</i>        |                                                                                                       |                                 |
| Metabolic syndrome                | 3578 <sup>2</sup>                                                                                     | 451                             |
| Insulin resistance                | 370 <sup>2</sup><br>2120 <sup>5</sup>                                                                 | 452<br>453                      |
| Diabetes mellitus                 | 1285 <sup>2</sup><br>429 <sup>2</sup><br>14080 <sup>3</sup>                                           | 454<br>455<br>456               |
| <i>Neurodegenerative diseases</i> |                                                                                                       |                                 |
| Alzheimer's disease               | 263 <sup>2</sup><br>53 <sup>2</sup>                                                                   | 87<br>88                        |
| Ocular Alzheimer's disease        | 156 <sup>2</sup>                                                                                      | 457                             |
| Idiopathic Parkinson's disease    | 106 <sup>2</sup><br>272 <sup>2</sup><br>30 <sup>6</sup>                                               | 458<br>[16]<br>459              |
| Multiple Sclerosis                | 64 <sup>2</sup>                                                                                       | 460                             |
| <i>Haematological diseases</i>    |                                                                                                       |                                 |
| IDA                               | 151 <sup>2</sup><br>311 <sup>2</sup><br>956 <sup>3</sup>                                              | 461<br>74<br>75                 |
| ITP                               | 85 <sup>6</sup><br>95 <sup>2</sup><br>244 <sup>2</sup>                                                | 462<br>463<br>81                |
| <i>Other</i>                      |                                                                                                       |                                 |
| Migraine                          | 903 <sup>3</sup>                                                                                      | 464                             |

|                   |                  |     |
|-------------------|------------------|-----|
| Chronic urticaria | 200 <sup>2</sup> | 465 |
| Rosacea           | 180 <sup>2</sup> | 466 |

**Table 2.: Recent studies on negative associations of *Helicobacter pylori* infection with extra-gastric disease**

<sup>1</sup>Population-based prospective cohort study; <sup>2</sup>Meta-analysis; <sup>3</sup>Prospective cohort study; <sup>4</sup> Randomised controlled trial; <sup>5</sup>Retrospective cohort study

| Disease                           | Number of Patients                                           | References        |
|-----------------------------------|--------------------------------------------------------------|-------------------|
| <i>Cardiovascular diseases</i>    |                                                              |                   |
| Acute coronary syndrome           | 9953 <sup>1</sup>                                            | 449               |
| Stroke                            | 166041 <sup>2</sup>                                          | 467               |
| <i>Neurodegenerative diseases</i> |                                                              |                   |
| Multiple Sclerosis                | 113 <sup>3</sup><br>849 <sup>3</sup>                         | 468<br>469        |
| <i>Haematological diseases</i>    |                                                              |                   |
| IDA                               | 200 <sup>3</sup><br>127 <sup>3</sup>                         | 470<br>471        |
| <i>Other</i>                      |                                                              |                   |
| Obesity                           | 1558 <sup>4</sup>                                            | [19]              |
| Asthma                            | 9492 <sup>5</sup>                                            | 472               |
| IBD                               | 1268 <sup>5</sup><br>9163 <sup>2</sup><br>80789 <sup>2</sup> | 473<br>474<br>475 |

**Table 3.** Expected rate of dual resistant *H. pylori* strains in a population, depending on previously known clarithromycin and metronidazole resistance.

*Populations expectations should always be correlated individually with susceptibility testing (wherever possible) or at the least with patient 's antibiotic history.*

| Metronidazole resistance | Clarithromycin resistance | Dual resistance |
|--------------------------|---------------------------|-----------------|
| <b>50%</b>               | 15%                       | 7.5%            |
|                          | 20%                       | 10%             |
|                          | <b>30%</b>                | <b>15%</b>      |
|                          | 40%                       | 20%             |
|                          | 50%                       | 25%             |
| <b>40%</b>               | 15%                       | 6%              |
|                          | 20%                       | 8%              |
|                          | 30%                       | 12%             |
|                          | <b>40%</b>                | <b>16%</b>      |
|                          | 50%                       | 20%             |
| <b>30%</b>               | 15%                       | 4.5%            |
|                          | 20%                       | 6%              |
|                          | 30%                       | 9%              |
|                          | 40%                       | 12%             |
|                          | <b>50%</b>                | <b>15%</b>      |
| 20%                      | 15%                       | 3%              |
|                          | 20%                       | 4%              |
|                          | 30%                       | 6%              |
|                          | 40%                       | 8%              |
|                          | 50%                       | 10%             |

**Table 4.** Example of efficacy of clarithromycin-containing regimens for an individual patient, based on predicted resistance to clarithromycin and metronidazole<sup>1</sup>

*Dark grey boxes denote successful eradication rates (>90%)*

| Antimicrobial prediction                           | 7-day triple therapy | 14-day triple therapy | 10-day sequential therapy | 14-day sequential therapy | 10-day concomitant therapy | 14-day concomitant therapy | 14-day bismuth quadruple therapy |
|----------------------------------------------------|----------------------|-----------------------|---------------------------|---------------------------|----------------------------|----------------------------|----------------------------------|
| Clarithromycin and metronidazole susceptible       | 94%                  | 97%                   | 95%                       | 98%                       | 94%                        | 97%                        | 99%                              |
| Clarithromycin resistant-metronidazole susceptible | <20%                 | 50%                   | 80%                       | 88%                       | 94%                        | 97%                        | 99%                              |
| Clarithromycin susceptible-metronidazole resistant | 94%                  | 97%                   | 75%                       | 75%                       | 94%                        | 97%                        | 95%                              |
| Clarithromycin and metronidazole resistant         | <20%                 | 50%                   | <20%                      | <20%                      | <25%                       | <50%                       | 95%                              |

**Table 5.** Reported cure rates for 10-day concomitant and sequential therapy against clarithromycin-resistant and metronidazole-susceptible *H. pylori* strains in head-to-head comparative trials.

|                                               | <b>Sequential</b>  | <b>Concomitant</b> |
|-----------------------------------------------|--------------------|--------------------|
| Georgopoulos, Greece <sup>189</sup> ,<br>2014 | 11/14 (79%)        | 11/14 (79%)        |
| Huang, China, 2012 <sup>476</sup>             | 3/5 (60%)          | 3/3 (100%)         |
| Molina-Infante, Spain, 2012 <sup>477</sup>    | 3/4 (75%)          | 5/5 (100%)         |
| Wu, Thailand 2010 <sup>478</sup>              | 4/7 (57%)          | 3/4 (75%)          |
| <b>Mean</b>                                   | <b>21/30 (70%)</b> | <b>22/26 (84%)</b> |

**Table 6.** Cumulative cure rates for concomitant and sequential therapy against clarithromycin-resistant and metronidazole-susceptible *H. pylori* strains in recent literature (inverse chronological order).

*Several studies<sup>22-27</sup> were excluded as they reported efficacy rates of sequential therapy against either clarithromycin susceptible- or resistant-strains, but did not analyze metronidazole susceptibility*

|                                            | <b>Sequential</b>   | <b>Concomitant</b> | <b>Treatment duration (days)</b> |
|--------------------------------------------|---------------------|--------------------|----------------------------------|
| Zhou, China, 2014 <sup>479</sup>           | 8/9 (88%)           | -                  | 10                               |
| Georgopoulos, Greece, 2014 <sup>189</sup>  | 11/14 (79%)         | 11/14 (79%)        | 10                               |
| Morse, Canada, 2013 <sup>480</sup>         | 0/1 (100%)          | -                  | 10                               |
| Molina-Infante, Spain, 2013 <sup>188</sup> | -                   | 5/5 (100%)         | 14                               |
| Georgopoulos, Greece, 2013 <sup>481</sup>  | -                   | 13/15 (87%)        | 10                               |
| Liou, Taiwan, 2013 <sup>214</sup>          | 10/14 (71%)         | -                  | 14                               |
| Liou, Taiwan, 2013 <sup>214</sup>          | 7/10 (70%)          | -                  | 10                               |
| Huang, China, 2012 <sup>476</sup>          | 3/5 (60%)           | 3/3 (100%)         | 10                               |
| Molina-Infante, Spain, 2012 <sup>477</sup> | 3/4 (75%)           | 5/5 (100%)         | 10                               |
| Wu, Thailand, 2010 <sup>478</sup>          | 4/7 (57%)           | 3/4 (75%)          | 10                               |
| Bontems, France, 2011 <sup>482</sup>       | 9/16 (56%)          | -                  | 10                               |
| Romano, Italy, 2010 <sup>483</sup>         | 9/12 (75%)          | -                  | 10                               |
| Vaira, Italy, 2007 <sup>484</sup>          | 8/9 (88%)           | -                  | 10                               |
| Zullo, Italy, 2003 <sup>485</sup>          | 7/9 (78%)           | -                  | 10                               |
| <b>Mean</b>                                | <b>79/110 (71%)</b> | <b>40/46 (87%)</b> |                                  |

**Table 7.** Reported cure rates for 10-day concomitant and sequential therapy against clarithromycin-susceptible and metronidazole-resistant *H. pylori* strains in head-to-head comparative trials.

|                                           | Sequential         | Concomitant        |
|-------------------------------------------|--------------------|--------------------|
| Georgopoulos, Greece, 2014 <sup>189</sup> | 21/28 (75%)        | 21/21 (100%)       |
| Huang, China, 2012 <sup>476</sup>         | 14/18 (78%)        | 16/16 (100%)       |
| Wu, Thailand 2010 <sup>478</sup>          | 27/30 (90%)        | 24/26 (92%)        |
| <b>Mean</b>                               | <b>62/76 (81%)</b> | <b>61/63 (97%)</b> |

**Table 8.** Cumulative cure rates for concomitant and sequential therapy against clarithromycin-susceptible and metronidazole-resistant *H. pylori* strains in recent literature (inverse chronological order).

|                                            | Sequential           | Concomitant          | Treatment duration (days) |
|--------------------------------------------|----------------------|----------------------|---------------------------|
| Zhou, China, 2014 <sup>479</sup>           | 41/47 (87%)          | -                    | 10                        |
| Georgopoulos, Greece, 2014 <sup>189</sup>  | 21/28 (75%)          | 21/21 (100%)         | 10                        |
| Morse, Canada, 2013 <sup>480</sup>         | 4/4 (100%)           | -                    | 10                        |
| Molina-Infante, Spain, 2013 <sup>188</sup> | -                    | 8/8 (100%)           | 14                        |
| Georgopoulos, Greece, 2013 <sup>481</sup>  | -                    | 25/25 (100%)         | 10                        |
| Liou, Taiwan, 2013 <sup>16</sup>           | 30/34 (88%)          | -                    | 14                        |
| Liou, Taiwan, 2013 <sup>16</sup>           | 32/44(73%)           | -                    | 10                        |
| Huang, China, 2012 <sup>8</sup>            | 14/18 (78%)          | 16/16 (100%)         | 10                        |
| Molina-Infante, Spain, 2012 <sup>10</sup>  | -                    | 8/8 (100%)           | 10                        |
| Wu, Thailand, 2010 <sup>478</sup>          | 27/30 (90%)          | 24/26 (92%)          | 10                        |
| Bontems, France, 2011 <sup>482</sup>       | 14/16 (88%)          | -                    | 10                        |
| Romano, Italy, 2010 <sup>483</sup>         | 13/14 (92%)          | -                    | 10                        |
| Kalach, France, 2008 <sup>486</sup>        | 4/5 (80%)            | -                    | 10                        |
| Vaira, Italy, 2007 <sup>484</sup>          | 34/35 (97%)          | -                    | 10                        |
| Zullo, Italy, 2003 <sup>485</sup>          | 34/36 (94%)          | -                    | 10                        |
| <b>Mean</b>                                | <b>268/311 (86%)</b> | <b>102/104 (98%)</b> |                           |

**Table 9.** Reported cure rates for 10-day concomitant and sequential therapy against dual clarithromycin- and metronidazole-resistant *H. pylori* strains in head-to-head comparative trials.

|                                            | <b>Sequential</b> | <b>Concomitant</b> |
|--------------------------------------------|-------------------|--------------------|
| Georgopoulos, Greece, 2014 <sup>189</sup>  | 2/5 (40%)         | 7/9 (78%)          |
| Huang, China, 2012 <sup>476</sup>          | 2/4 (50%)         | 2/2 (100%)         |
| Molina-Infante, Spain, 2012 <sup>477</sup> | 3/5 (60%)         | 3/4 (75%)          |
| Wu, Thailand, 2010 <sup>478</sup>          | 1/3 (33%)         | 3/4 (75%)          |
| <b>Mean</b>                                | <b>8/17 (47%)</b> | <b>15/19 (79%)</b> |

**Table 10.** Cumulative cure rates for **concomitant and sequential therapy** against **dual clarithromycin- and metronidazole-resistant *H. pylori*** strains in recent literature (inverse chronological order).

|                                            | <b>Sequential</b>  | <b>Concomitant</b> | <b>Treatment duration (days)</b> |
|--------------------------------------------|--------------------|--------------------|----------------------------------|
| Zhou, China, 2014 <sup>479</sup>           | 17/37 (46%)        | -                  | 10                               |
| Georgopoulos, Greece, 2014 <sup>189</sup>  | 2/5 (40%)          | 7/9 (78%)          | 10                               |
| Morse, Canada, 2013 <sup>480</sup>         | 1/1 (100%)         | -                  | 10                               |
| Molina-Infante, Spain, 2013 <sup>188</sup> | -                  | 3/3 (100%)         | 14                               |
| Georgopoulos, Greece, 2013 <sup>481</sup>  | -                  | 7/10 (70%)         | 10                               |
| Liou, Taiwan, 2013 <sup>214</sup>          | 3/8 (37%)          | -                  | 14                               |
| Huang, China, 2012 <sup>476</sup>          | 2/4 (50%)          | 2/2 (100%)         | 10                               |
| Molina-Infante, Spain, 2012 <sup>477</sup> | 3/5 (60%)          | 3/4 (75%)          | 10                               |
| Wu, Thailand, 2010 <sup>478</sup>          | 1/3 (33%)          | 3/4 (75%)          | 10                               |
| Romano, Italy, 2010 <sup>483</sup>         | 0/3 (0%)           | -                  | 10                               |
| Kalach, France 2008 <sup>486</sup>         | 1/1 (100%)         | -                  | 10                               |
| Vaira, Italy, 2007 <sup>484</sup>          | 0/4 (0%)           | -                  | 10                               |
| Zullo, Italy, 2003 <sup>485</sup>          | 8/10 (80%)         | -                  | 10                               |
| <b>Mean</b>                                | <b>38/81 (47%)</b> | <b>25/32 (78%)</b> |                                  |

**Table 11.** Studies evaluating the efficacy of a third-line combination of a PPI, amoxicillin, and levofloxacin for the eradication of *H. pylori* infection after two eradication failures.

| Author                       | Year of publication | Number of patients | Previous (failed) treatments                                        | Duration (days) | Eradication <sup>1</sup> (%) |
|------------------------------|---------------------|--------------------|---------------------------------------------------------------------|-----------------|------------------------------|
| Gatta et al <sup>270</sup>   | 2005                | 151                | 1 <sup>st</sup> : PPI+C+A or M<br>2 <sup>nd</sup> : PPI+C+A or M; Q |                 | 76                           |
| Gisbert et al <sup>271</sup> | 2006                | 100                | 1 <sup>st</sup> : PPI+C+A<br>2 <sup>nd</sup> : Q                    | 10              | 60                           |
| Gisbert et al <sup>272</sup> | 2006                | 20                 | 1 <sup>st</sup> : PPI+C+A<br>2 <sup>nd</sup> : Q                    | 10              | 85                           |
| Rokkas et al <sup>273</sup>  | 2009                | 30                 | 1 <sup>st</sup> : PPI+C+A<br>2 <sup>nd</sup> : Q                    | 10              | 70                           |
| Gisbert et al <sup>274</sup> | 2012                | 200                | 1 <sup>st</sup> : PPI+C+A<br>2 <sup>nd</sup> : Q                    | 10              | 68                           |

<sup>1</sup>Intention-to-treat.

PPI: proton pump inhibitor; C: clarithromycin; M: metronidazole; A: amoxicillin; Q: bismuth-containing quadruple therapy (PPI, bismuth, tetracycline and M).

**Table 12.** Studies evaluating the efficacy of a combination of a PPI, amoxicillin, levofloxacin and bismuth for the eradication of *H. pylori* infection.

| Author & publication year | Country | Treatment order | Duration (days) | Eradication rate by intention-to-treat n/N (%) |
|---------------------------|---------|-----------------|-----------------|------------------------------------------------|
| Bago 2007 <sup>297</sup>  | Croatia | First           | 7               | 57/66 (86%)                                    |
| Gao 2010 <sup>298</sup>   | China   | First           | 10              | 60/72 (83%)                                    |
| Hsu 2008 <sup>299</sup>   | Taiwan  | Third           | 10              | 31/37 (84%)                                    |
| Liao 2013 <sup>296</sup>  | China   | First           | 14              | 70/80 (87.5%)                                  |
| Yee 2007 <sup>300</sup>   | China   | ≥ Second        | 7               | 37/51 (73%)                                    |
| Gisbert <sup>284</sup>    | Spain   | Second          | 14              | 180/200 (90%)                                  |



**Table 13.** Studies evaluating the efficacy of a third-line combination of a PPI, amoxicillin, and levofloxacin for the eradication of *H. pylori* infection after two eradication failures.

| <b>Author and Reference</b>         | <b>Year of publication</b> | <b>Number of patients</b> | <b>Previous (failed) treatments</b>                                 | <b>Duration(days)</b> | <b>Eradication<sup>1</sup> (%)</b> |
|-------------------------------------|----------------------------|---------------------------|---------------------------------------------------------------------|-----------------------|------------------------------------|
| <i>Gatta et al</i> <sup>270</sup>   | 2005                       | 151                       | 1 <sup>st</sup> : PPI+C+A or M<br>2 <sup>nd</sup> : PPI+C+A or M; Q |                       | 76                                 |
| <i>Gisbert et al</i> <sup>271</sup> | 2006                       | 100                       | 1 <sup>st</sup> : PPI+C+A<br>2 <sup>nd</sup> : Q                    | 10                    | 60                                 |
| <i>Gisbert et al</i> <sup>272</sup> | 2006                       | 20                        | 1 <sup>st</sup> : PPI+C+A<br>2 <sup>nd</sup> : Q                    | 10                    | 85                                 |
| <i>Rokkas et al</i> <sup>273</sup>  | 2009                       | 30                        | 1 <sup>st</sup> : PPI+C+A<br>2 <sup>nd</sup> : Q                    | 10                    | 70                                 |
| <i>Gisbert et al</i> <sup>274</sup> | 2012                       | 200                       | 1 <sup>st</sup> : PPI+C+A<br>2 <sup>nd</sup> : Q                    | 10                    | 68                                 |

<sup>1</sup>Intention-to-treat.

PPI: proton pump inhibitor; C: clarithromycin; M: metronidazole; A: amoxicillin; Q: bismuth-containing quadruple therapy (PPI, bismuth, tetracycline and M).
