# Supplementary material
Source: HighWire-hosted journal article supplement (https://gut.bmj.com/content/66/1/6)

**Figure 2.** Meta-analysis comparing the efficacy (intention-to-treat) of the concomitant and sequential therapy (with a similar duration) for *H. pylori* eradication<sup>9</sup>.

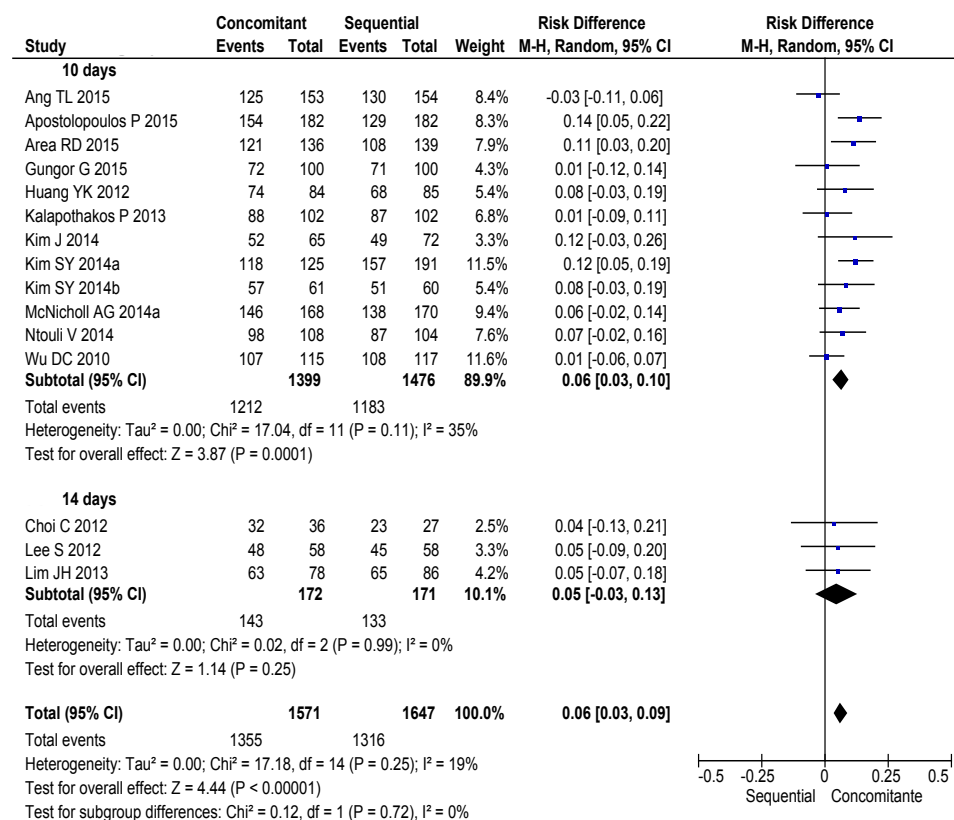

Figure 3. Efficacy (intention-to-treat) of a triple treatment with a PPI, amoxicillin and levofloxacin, after a first-line treatment failure with a PPI, amoxicillin and clarithromycin.

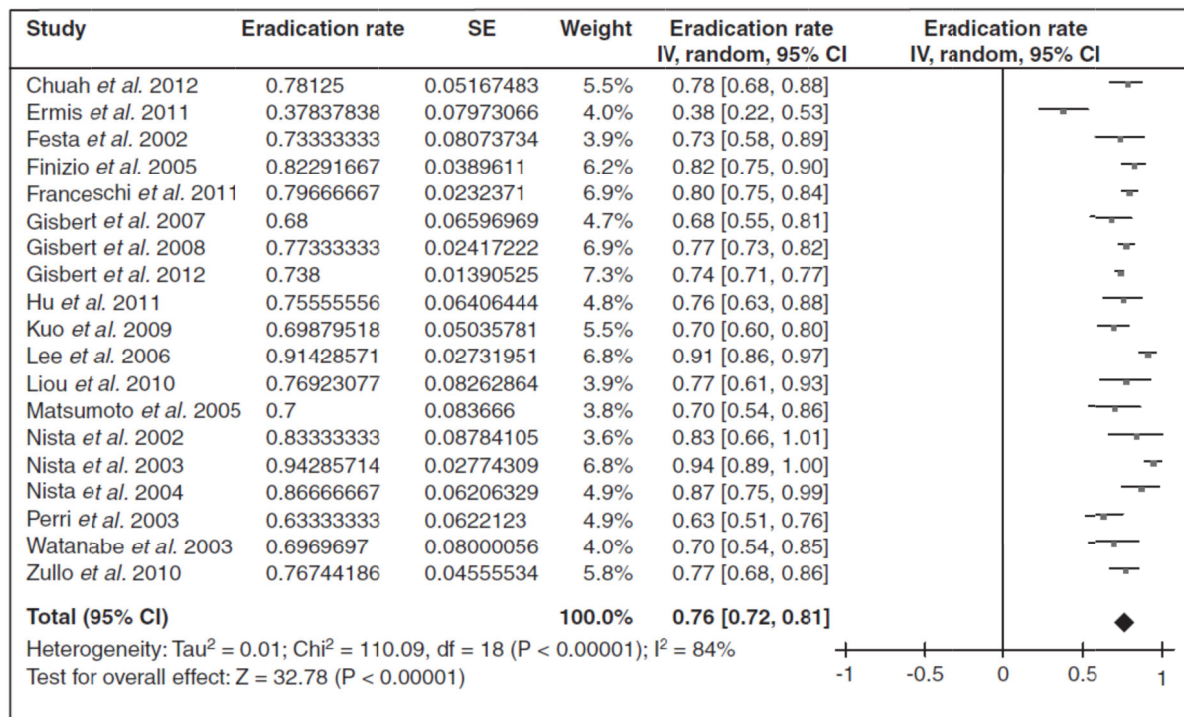

Figure 4. Efficacy (intention-to-treat) of the bismuth-containing quadruple therapy with a PPI, bismuth, tetracycline and metronidazole, after a first-line treatment failure with a PPI, amoxicillin and clarithromycin.

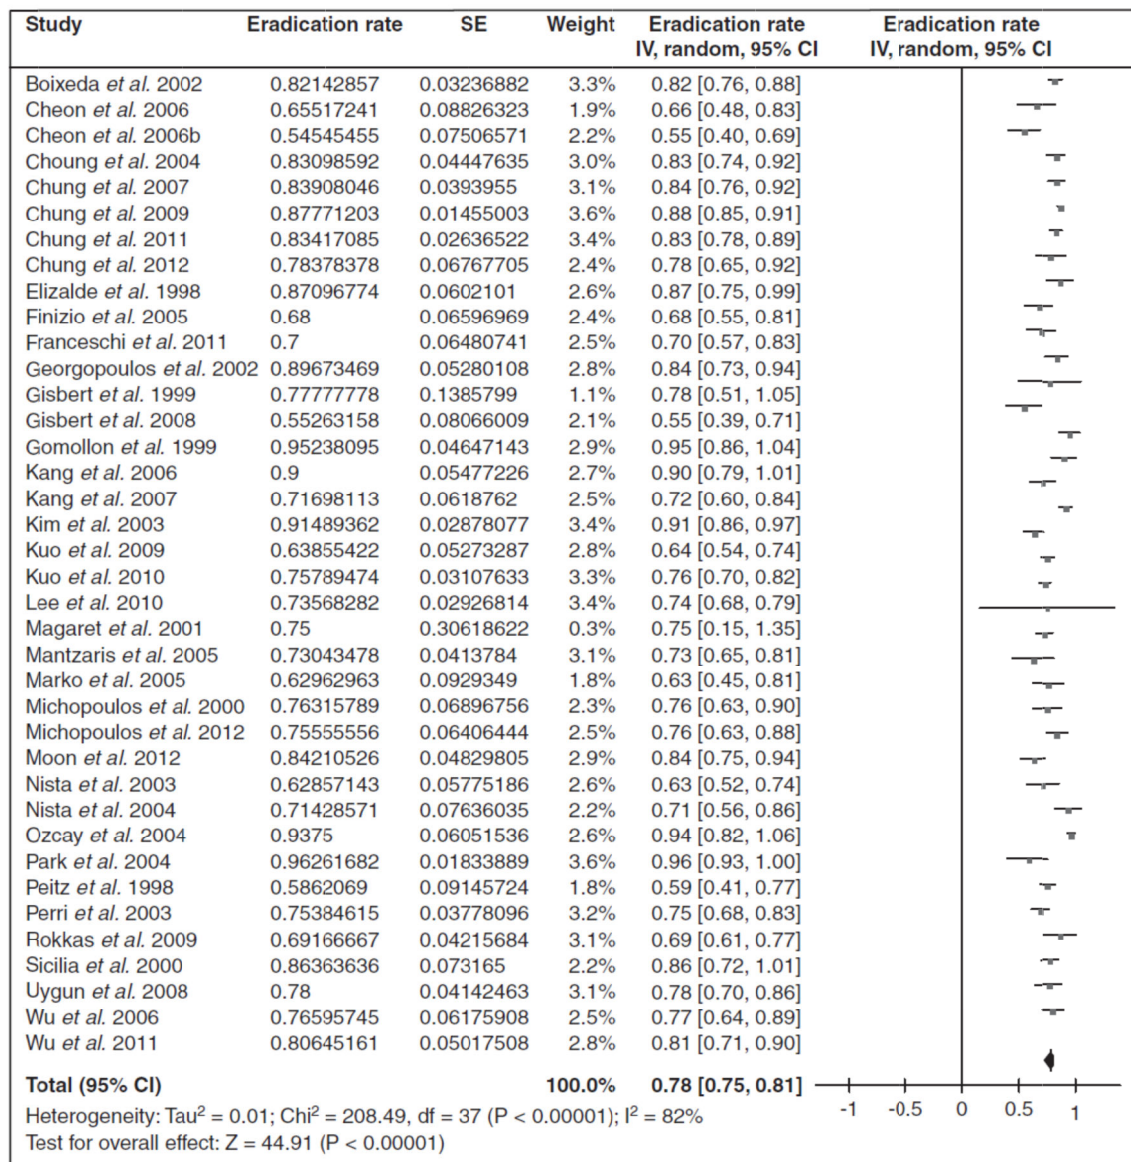

**Figure 5.** Second-line eradication rate with levofloxacin-amoxicillin-PPI after the failure of a non-BQT.

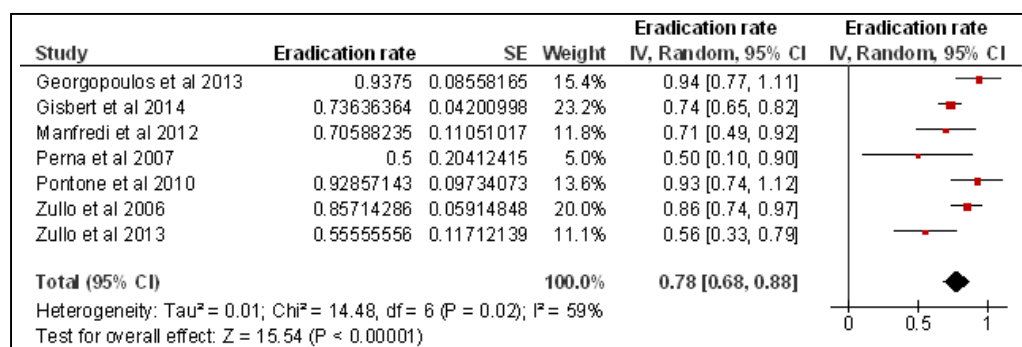

**Figure 6.** Second-line eradication rate with levofloxacin-amoxicillin-PPI after the failure of the sequential therapy.

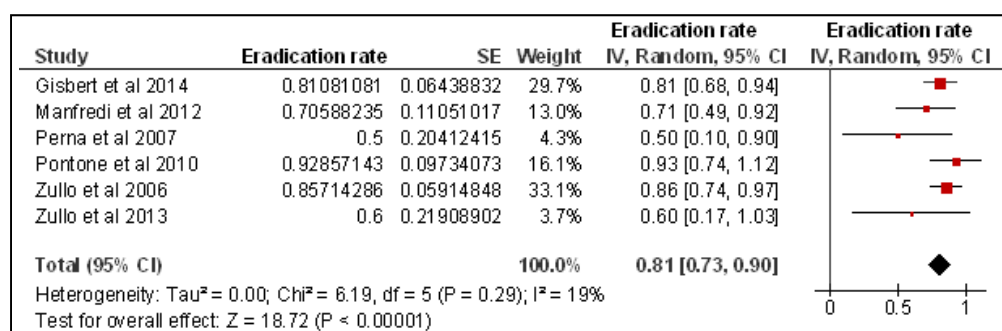

**Figure 7.** Second-line eradication rate with levofloxacin-amoxicillin-PPI after the failure of the concomitant therapy.

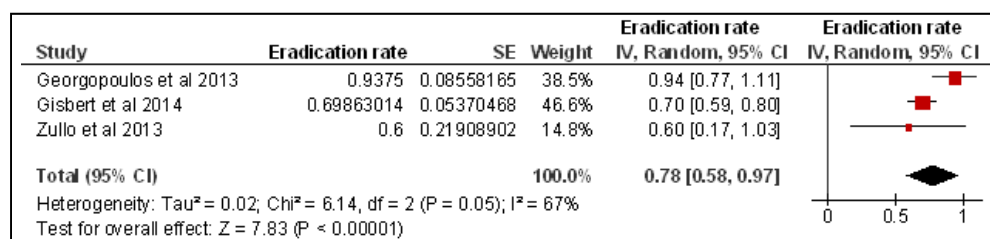

**Figure 8.** Second-line eradication rate with bismuth-tetracycline-metronidazole-PPI after the failure of the sequential therapy.

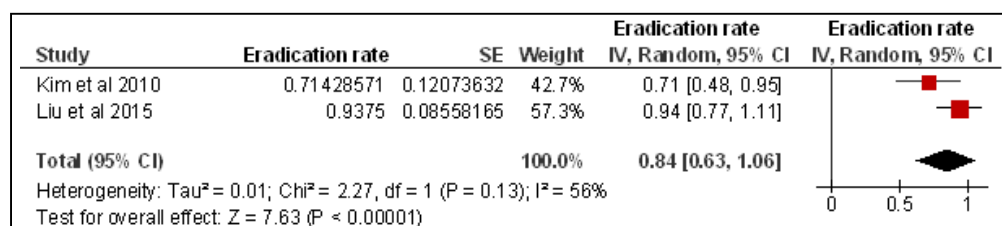

Supplement: inline-supplementary-material-3 [file inline-supplementary-material-3.pdf]
